# Supplementary material
Source: Springer Nature journal article supplement (https://www.springermedizin.de/resource/supplementary/13023_2009_193_MOESM32_ESM.pdf/9641832)
Supplement: MOESM32 [file 9641832]

### A. Correct folding and assembly

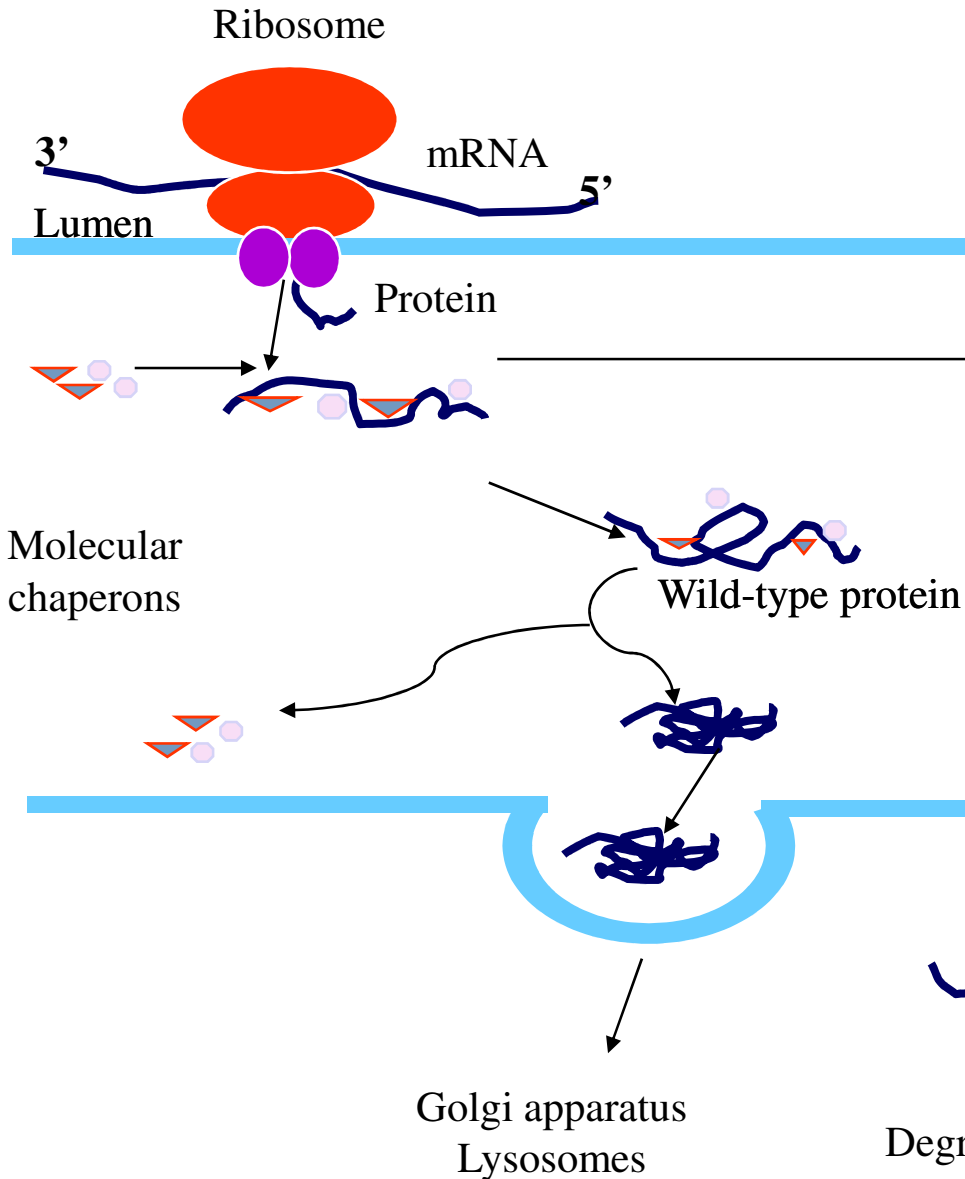

### B. Misfolding and mis-assembly

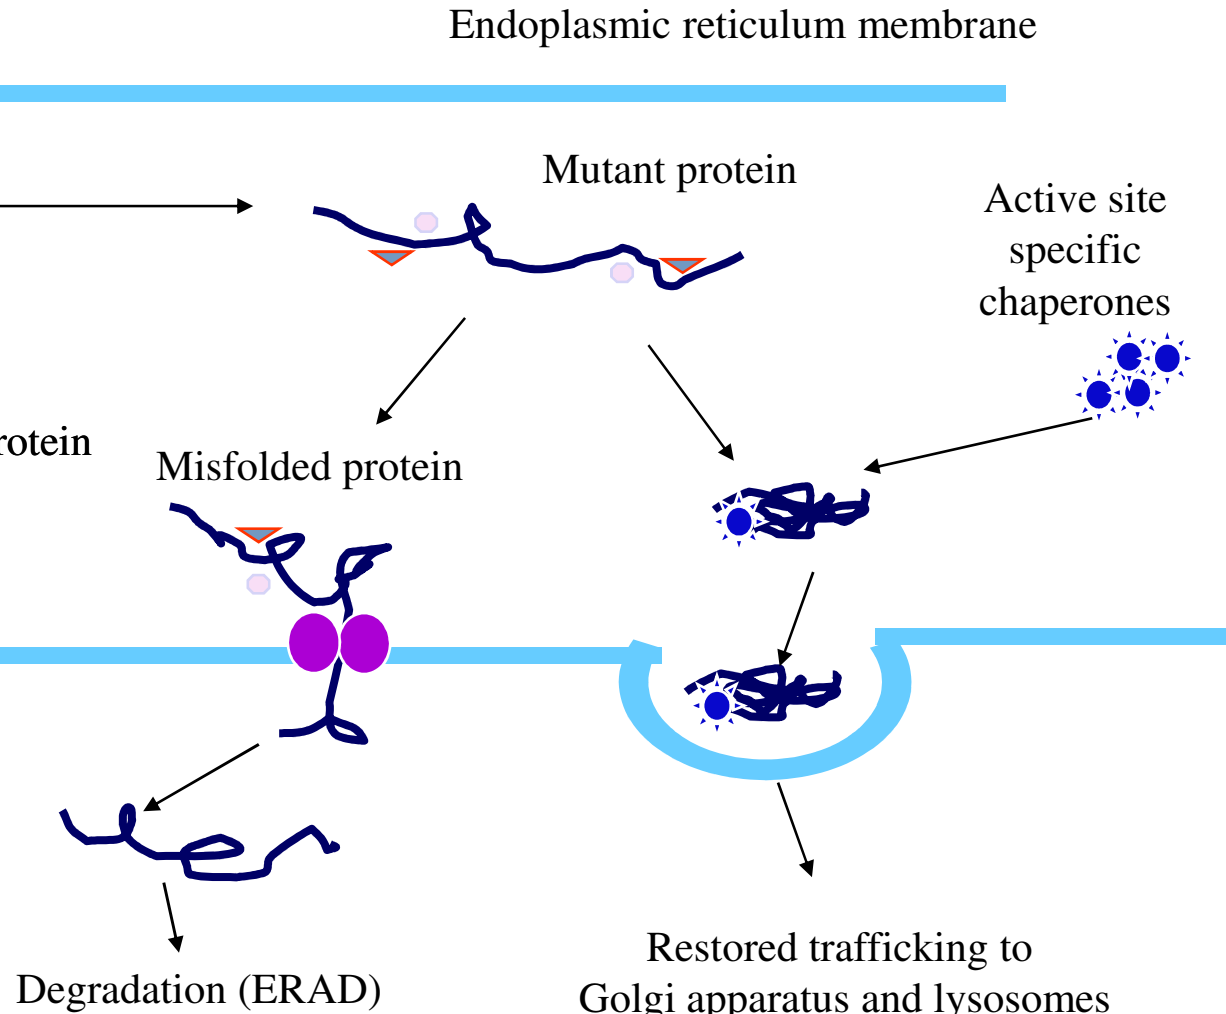

### C. Restored trafficking to Golgi apparatus and lysosomes

Restored trafficking to Golgi apparatus and lysosomes
